# Supplementary material for: Plasmodium vivax Liver and Blood Stages Recruit the Druggable Host Membrane Channel Aquaporin-3
Source: PubMed Central journal article supplement (PMC7303948; doi:10.1016/j.chembiol.2020.03.009), 2020-06-18
Supplement: mmc1.pdf [file mmc1.pdf]

Cell Chemical Biology, Volume 27

**Supplemental Information**

***Plasmodium vivax* Liver and Blood Stages Recruit  
the Druggable Host Membrane Channel Aquaporin-3**

**Dora Posfai, Steven P. Maher, Camille Roesch, Amélie Vantaux, Kayla Sylvester, Julie Péneau, Jean Popovici, Dennis E. Kyle, Benoît Witkowski, and Emily R. Derbyshire**

## Supplemental Information

### ***Plasmodium vivax* liver and blood stages recruit the druggable host membrane channel aquaporin-3**

Dora Posfai\*, Steven P. Maher\*, Camille Roesch, Amélie Vantaux, Kayla Sylvester, Julie Péneau, Jean Popovici, Dennis E. Kyle, Benoît Witkowski<sup>†</sup>, and Emily R. Derbyshire<sup>†</sup>

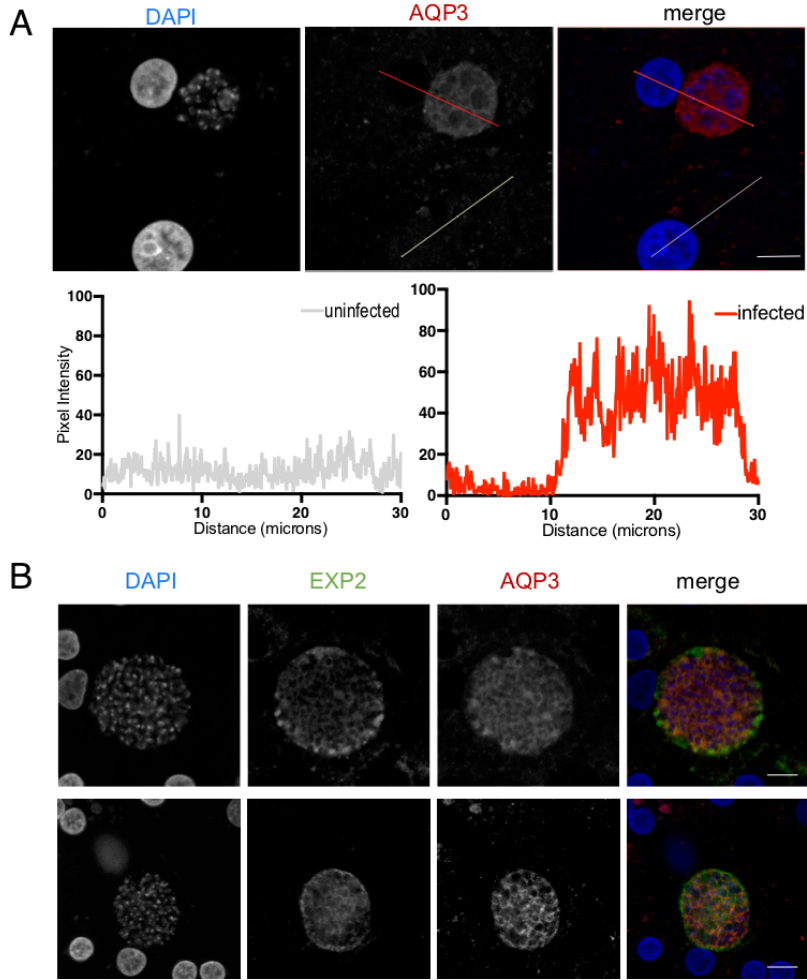

**Figure S1, related to Figure 1. AQP3 localization during *P. vivax* infection of PHH.**  
 A) PHH infected with *P. vivax* are stained 8 dpi with anti-*HsAQP3* (red) and DAPI (blue). Lines indicate measurement for pixel intensity in uninfected (grey) and infected (red) cells. Quantification shown below images is pixel intensity vs distance across each line. B) *P. vivax*-infected PHH stained with anti-*PvEXP2* (green), anti-*HsAQP3* (red), and DAPI (blue) on 8 dpi. Two represented cells are shown. Merged images show that *HsAQP3* staining does not completely overlap with *PvEXP2* staining. Scale bar = 10  $\mu$ M.

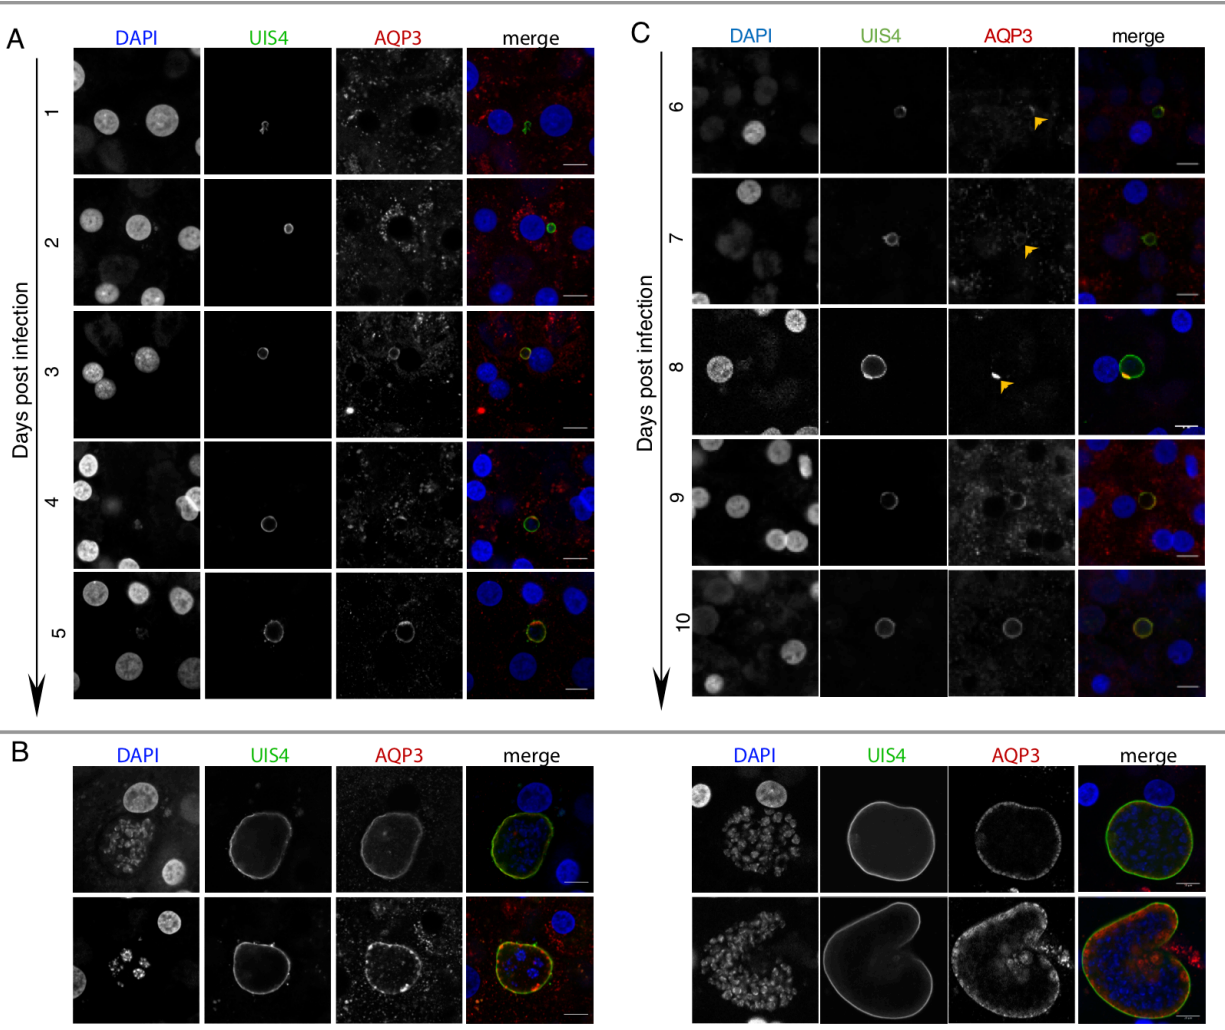

**Figure S2, related to Figure 2. AQP3 localization to parasitophorous vacuole during *P. vivax* liver-stage schizont development.** A) Images of primary hepatocytes infected with *P. vivax* from day 1 through 5 prior to distinction between forms. B) Large mature schizont morphologies of various cells showing variability of infection and *HsAQP3* patterns (red). C) PI4K inhibitor (MMV390048)-treated cells infected with *P. vivax*, showing hypnozoites from day 6-10. Arrows indicate *HsAQP3* localization to hypnozoites. Cells stained with *PvUIS4* (green), *HsAQP3* (red), and DAPI (blue). Scale bar = 10  $\mu$ M.

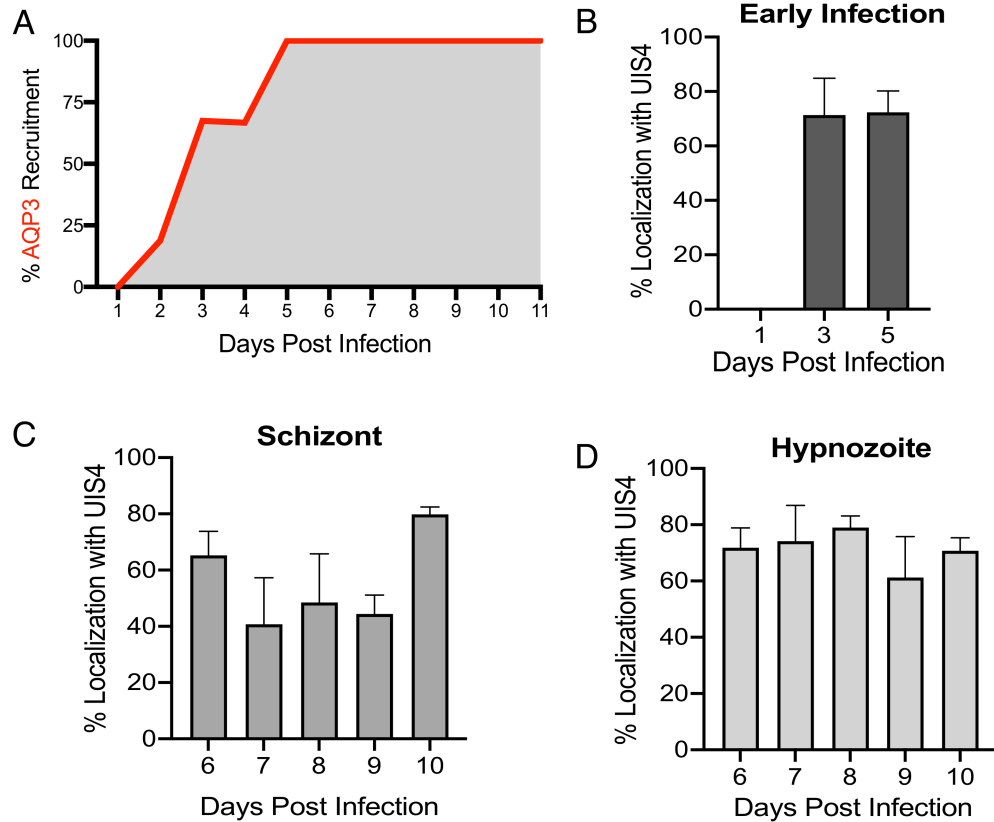

**Figure S3, related to Figure 2. AQP3 recruitment and UIS4 co-localization in *P. vivax* liver-stage parasites.** A) Percent of cells with AQP3 localization was determined throughout infection (days 1-11). Every *P. vivax*-infected cell displayed AQP3 recruitment by day 5. Population quantified was a mixture of small and large liver-stage forms. Percent of AQP3 colocalizing with *PvUIS4* staining in B) days 1-5 early infections and days 6-11 C) schizonts and D) hypnozoites. Data shown is average colocalization  $\pm$  SEM with at least two infections.

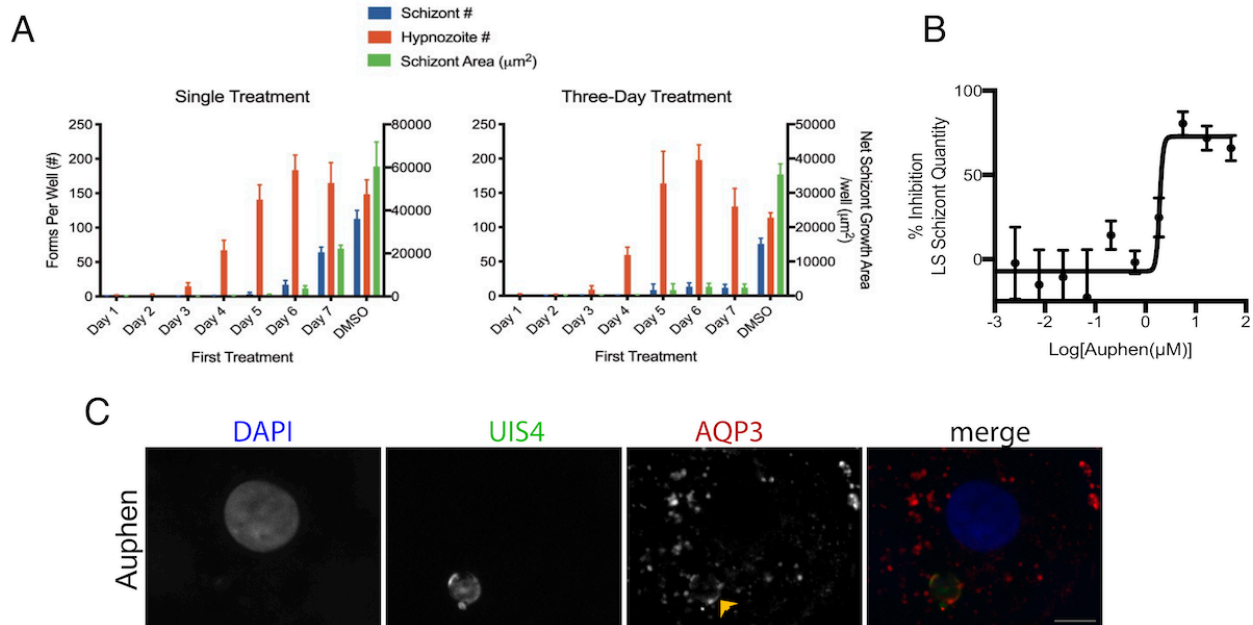

**Figure S4, related to Figure 2. Sensitivity to treatment and AQP3 recruitment with auphen.** A) PI4K inhibitor MMV390048 was added to *P. vivax* liver stage cultures either once (left) or fresh each day over three days (right), with the first treatment day indicated (x-axis). Number of hypnozoites, number of liver schizonts (left y-axis) and schizont growth area (right y-axis) were quantified by HCI. Errors bars represent SD of triplicate technical replicate wells, data are representative of two independent experiments. B) Dose-response curve of auphen inhibition of *P. vivax* schizont quantity per well. Data shown as the average  $\pm$  SEM of all independent experiments. C) Confocal images of *P. vivax* LS parasite on day 8 post-infection of PHH in the presence of 1.85  $\mu$ M auphen. Arrow indicates AQP3 localization following treatment. Cells stained with PvUIS4 (green), HsAQP3 (red), and DAPI (blue). Scale bar = 5  $\mu$ M.
